# Supplementary material
Source: HighWire-hosted journal article supplement (https://heart.bmj.com/content/106/22/1732)
Supplement: inline-supplementary-material-1 [file inline-supplementary-material-1.pdf]

## Establishing Reference Ranges for Ambulatory Electrocardiography: A Meta-Analysis

### Supplementary Material

#### Table of Contents

|                                                                                                                        |           |
|------------------------------------------------------------------------------------------------------------------------|-----------|
| <i>eTable 1: MOOSE checklist for meta-analyses of observational studies.....</i>                                       | <i>2</i>  |
| <i>eTable 2: Detailed search strategy:.....</i>                                                                        | <i>4</i>  |
| <i>eFigure 1: Study selection .....</i>                                                                                | <i>5</i>  |
| <i>eFigure 2: Forest plots for the prevalence of sinus pauses of &gt;2 and &gt;3 seconds.....</i>                      | <i>6</i>  |
| <i>eFigure 3: Forest plot for the prevalence of first degree atrioventricular block.....</i>                           | <i>7</i>  |
| <i>eFigure 4: Forest plot for the prevalence of second degree AV Block, type 1 .....</i>                               | <i>8</i>  |
| <i>eFigure 5: Funnel plots for meta-analyses of sinus pauses and conduction block.....</i>                             | <i>9</i>  |
| <i>eFigure 6: Forest plot for the prevalence of any supraventricular ectopy .....</i>                                  | <i>10</i> |
| <i>eFigure 7: Funnel plots for meta-analyses of supraventricular ectopy and tachycardia .....</i>                      | <i>11</i> |
| <i>eFigure 8: Forest plot for the prevalence with any ventricular ectopy .....</i>                                     | <i>12</i> |
| <i>eFigure 9: Funnel plots for meta-analyses of ventricular ectopy and non-sustained ventricular tachycardia .....</i> | <i>13</i> |
| <i>Heart Rate Analysis .....</i>                                                                                       | <i>14</i> |
| <i>eFigure 10: Forest plots of mean, minimum and maximum Heart Rates.....</i>                                          | <i>15</i> |
| <i>eFigure 11: Funnel plots for meta-analyses of mean, minimum and maximum heart rates ...</i>                         | <i>16</i> |
| <i>Additional References: References 31-61 .....</i>                                                                   | <i>17</i> |

**eTable 1: MOOSE checklist for meta-analyses of observational studies**

| Item No                                     | Recommendation                                                                                                                                                                                                                                                               | Reported on Page No |
|---------------------------------------------|------------------------------------------------------------------------------------------------------------------------------------------------------------------------------------------------------------------------------------------------------------------------------|---------------------|
| Reporting of background should include      |                                                                                                                                                                                                                                                                              |                     |
| 1                                           | Problem definition                                                                                                                                                                                                                                                           | 5                   |
| 2                                           | Hypothesis statement                                                                                                                                                                                                                                                         | -                   |
| 3                                           | Description of study outcome(s)                                                                                                                                                                                                                                              | 6                   |
| 4                                           | Type of exposure or intervention used                                                                                                                                                                                                                                        | 6                   |
| 5                                           | Type of study designs used                                                                                                                                                                                                                                                   | 6                   |
| 6                                           | Study population                                                                                                                                                                                                                                                             | 6                   |
| Reporting of search strategy should include |                                                                                                                                                                                                                                                                              |                     |
| 7                                           | Qualifications of searchers (eg, librarians and investigators)                                                                                                                                                                                                               | 6                   |
| 8                                           | Search strategy, including time period included in the synthesis and key words                                                                                                                                                                                               | Table e2            |
| 9                                           | Effort to include all available studies, including contact with authors                                                                                                                                                                                                      | 6                   |
| 10                                          | Databases and registries searched                                                                                                                                                                                                                                            | 6                   |
| 11                                          | Search software used, name and version, including special features used (eg, explosion)                                                                                                                                                                                      | 6, Table e2         |
| 12                                          | Use of hand searching (eg, reference lists of obtained articles)                                                                                                                                                                                                             | 6                   |
| 13                                          | List of citations located and those excluded, including justification                                                                                                                                                                                                        | Figure e1           |
| 14                                          | Method of addressing articles published in languages other than English                                                                                                                                                                                                      | 6                   |
| 15                                          | Method of handling abstracts and unpublished studies                                                                                                                                                                                                                         | 6                   |
| 16                                          | Description of any contact with authors                                                                                                                                                                                                                                      | 6                   |
| Reporting of methods should include         |                                                                                                                                                                                                                                                                              |                     |
| 17                                          | Description of relevance or appropriateness of studies assembled for assessing the hypothesis to be tested                                                                                                                                                                   | 8, Table 1          |
| 18                                          | Rationale for the selection and coding of data (eg, sound clinical principles or convenience)                                                                                                                                                                                | 7                   |
| 19                                          | Documentation of how data were classified and coded (eg, multiple raters, blinding and interrater reliability)                                                                                                                                                               | 7                   |
| 20                                          | Assessment of confounding (eg, comparability of cases and controls in studies where appropriate)                                                                                                                                                                             | N/A                 |
| 21                                          | Assessment of study quality, including blinding of quality assessors, stratification or regression on possible predictors of study results                                                                                                                                   | 7                   |
| 22                                          | Assessment of heterogeneity                                                                                                                                                                                                                                                  | 8                   |
| 23                                          | Description of statistical methods (eg, complete description of fixed or random effects models, justification of whether the chosen models account for predictors of study results, dose-response models, or cumulative meta-analysis) in sufficient detail to be replicated | 8                   |
| 24                                          | Provision of appropriate tables and graphics                                                                                                                                                                                                                                 | Table 2, Figures    |

| Reporting of results should include |                                                                     |                      |
|-------------------------------------|---------------------------------------------------------------------|----------------------|
| 25                                  | Graphic summarizing individual study estimates and overall estimate | Figures and eFigures |
| 26                                  | Table giving descriptive information for each study included        | Table 1              |
| 27                                  | Results of sensitivity testing (eg, subgroup analysis)              | N/A                  |
| 28                                  | Indication of statistical uncertainty of findings                   | 9-11                 |

**eTable 2: Detailed search strategy:**

| # | Searches                                                                                                                                                                                                                                                                                                                                                                                                                                                                                                                                                                                                                                                                                                                                                                                   |
|---|--------------------------------------------------------------------------------------------------------------------------------------------------------------------------------------------------------------------------------------------------------------------------------------------------------------------------------------------------------------------------------------------------------------------------------------------------------------------------------------------------------------------------------------------------------------------------------------------------------------------------------------------------------------------------------------------------------------------------------------------------------------------------------------------|
| 1 | (healthy adult* or normal adult* or asymptomatic adult* or healthy participant* or asymptomatic participant* or normal participant* or healthy subject* or normal subject* or asymptomatic subject* or healthy population* or normal population* or asymptomatic population or free of heart disease or without apparent heart disease or active elderly or normal human or house officers or runner* or athlete* or healthy elderly).ti,ab.                                                                                                                                                                                                                                                                                                                                               |
| 2 | exp electrocardiography/ or holter.mp. or ambulatory ECG.mp.                                                                                                                                                                                                                                                                                                                                                                                                                                                                                                                                                                                                                                                                                                                               |
| 3 | exp Arrhythmias, Cardiac/ or monitoring, physiologic.mp. or heart arrhythmia*.mp.                                                                                                                                                                                                                                                                                                                                                                                                                                                                                                                                                                                                                                                                                                          |
| 4 | 1 and 2 and 3                                                                                                                                                                                                                                                                                                                                                                                                                                                                                                                                                                                                                                                                                                                                                                              |
| 5 | 4 not (case report* or letter* or comment* or editorial* or review* or notes* or "conference abstract").pt.                                                                                                                                                                                                                                                                                                                                                                                                                                                                                                                                                                                                                                                                                |
| 6 | 5 not (exp infant/ or exp child/ or exp cells/)                                                                                                                                                                                                                                                                                                                                                                                                                                                                                                                                                                                                                                                                                                                                            |
| 7 | limit 6 to humans                                                                                                                                                                                                                                                                                                                                                                                                                                                                                                                                                                                                                                                                                                                                                                          |
| 8 | 7 not (exp vascular diseases/ or exp cardiovascular infections/ or exp cardiovascular abnormalities/ or exp Carcinoid Heart Disease/ or exp Cardiac Output, High/ or exp Cardiac Output, Low/ or exp Cardiac Tamponade/ or exp Cardiomegaly/ or exp Cardiomyopathies/ or exp Endocarditis/ or exp Heart Aneurysm/ or exp Heart Arrest/ or exp Heart Defects, Congenital/ or exp Heart Failure/ or exp Heart Neoplasms/ or exp Heart Rupture/ or exp Heart Valve Diseases/ or exp Myocardial Ischemia/ or exp Myocardial Stunning/ or exp Pericardial Effusion/ or exp Pericarditis/ or exp Pneumopericardium/ or exp Postpericardiotomy Syndrome/ or exp Pulmonary Heart Disease/ or exp Rheumatic Heart Disease/ or exp Ventricular Dysfunction/ or exp Ventricular Outflow Obstruction/) |
| 9 | 8 not (exp syncope/ or exp diving/ or exp physical exertion/ or exp Wolff-Parkinson-White/ or exp stroke/ or exp transient ischemic attack/ or exp cerebrovascular accident/ or exp sudden death/ or exp cardiac pathology/ or exp wandering pacemaker/ or exp metaraminol/ or exp ajmaline/ or exp quinidine/ or exp glycinexylidide/ or exp atropine/ or exp methscopolamine/ or exp hyperlipidemia/ or exp sinus node dysfunction/ or exp vasoregulatory abnormality/ or exp procainamide/ or exp propafenone/ or exp mexilitine/)                                                                                                                                                                                                                                                      |

**eFigure 1: Study selection**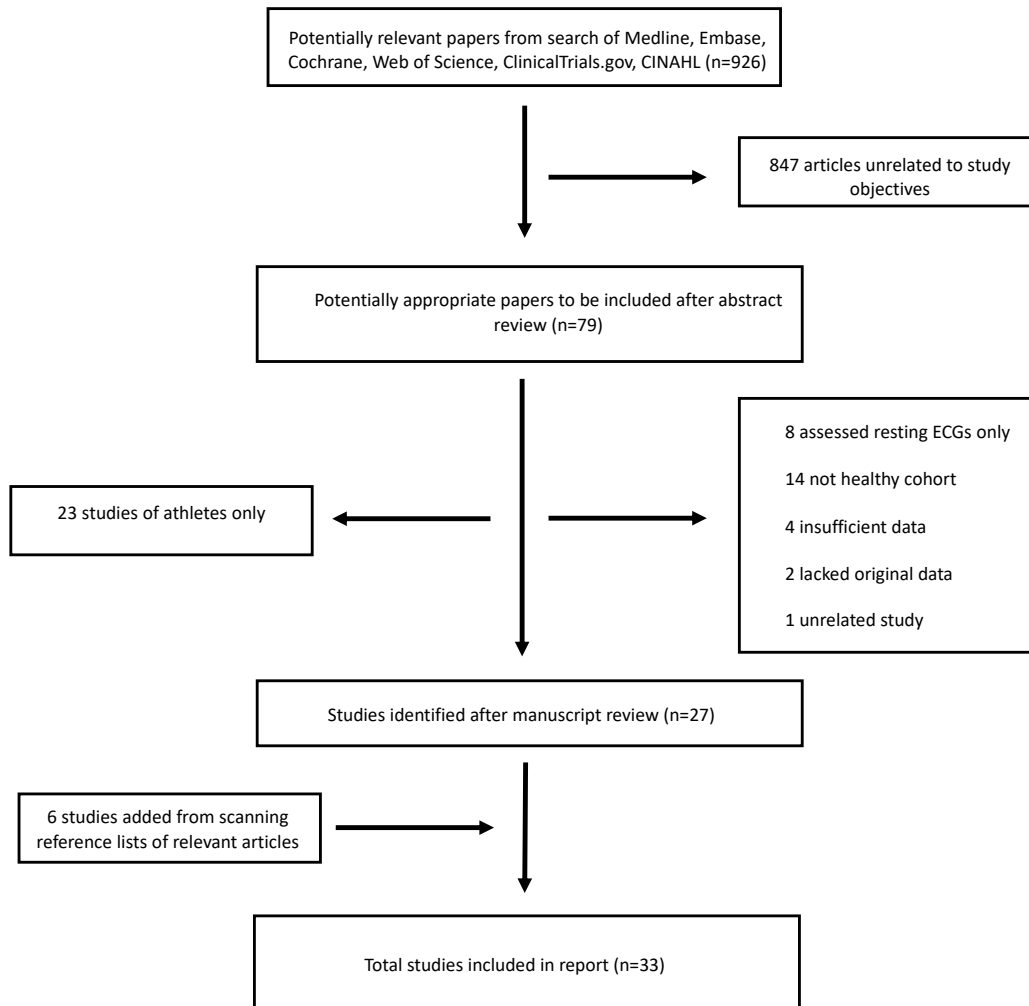

Abbreviations: CINAHL, Cumulative Index to Nursing and Allied Health Literature; ECG, electrocardiogram.

**Figure 2:** Forest plots for the prevalence of sinus pauses of >2 and >3 seconds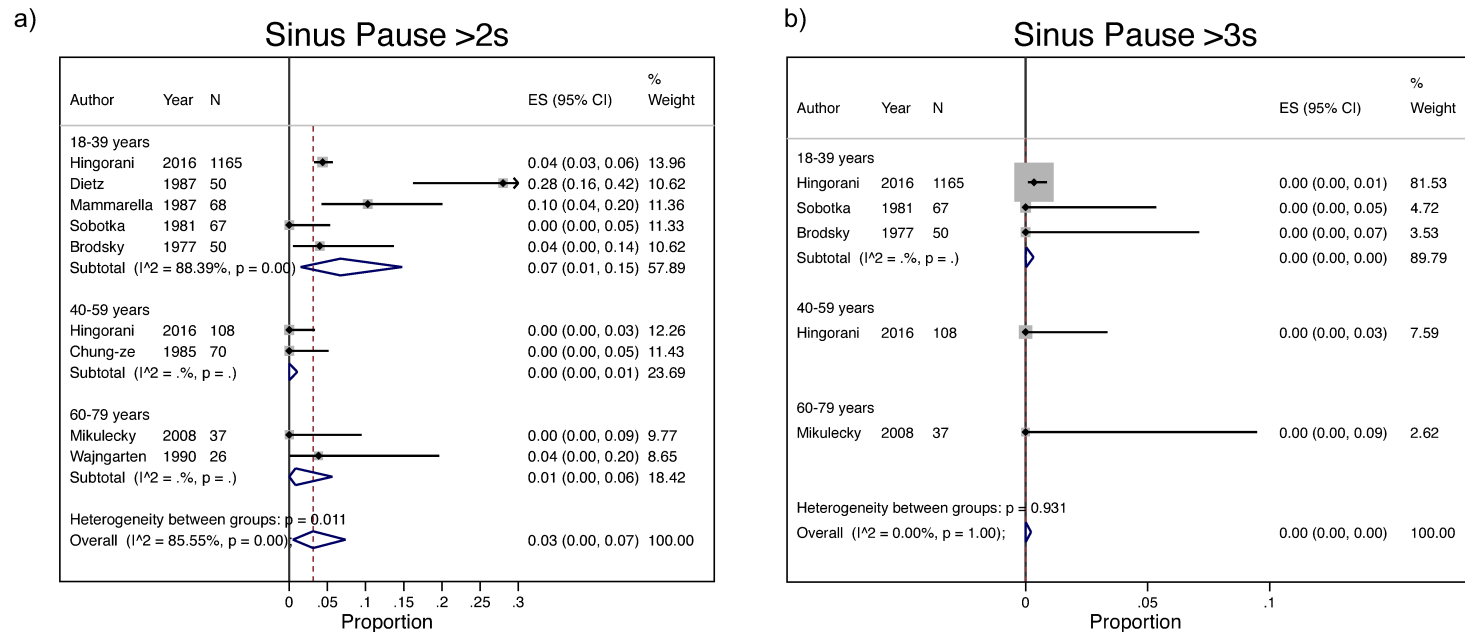

ES (effect size) denotes prevalence of sinus pauses >2 seconds (panel a) and >3 seconds (panel b) for each study and the weighted mean prevalence by age group and overall. Note within age-group heterogeneity could not be tested for some groups due to the small number of studies and/or no events in some studies.

**eFigure 3:** Forest plot for the prevalence of first degree atrioventricular block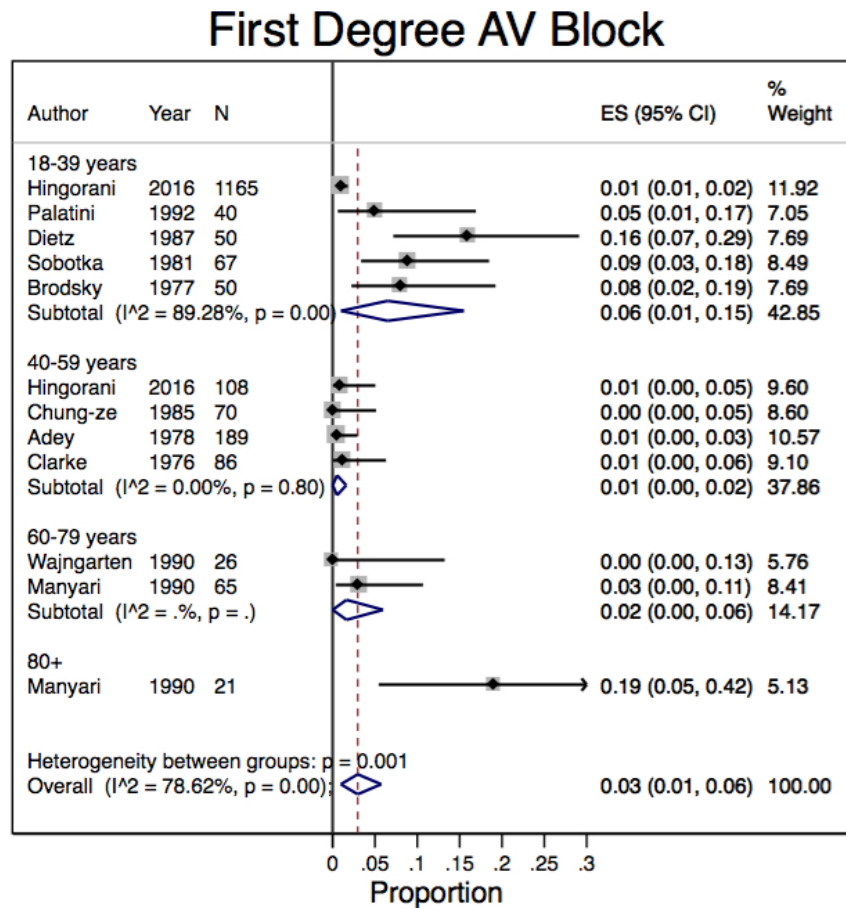

ES (effect size) denotes prevalence of first degree atrioventricular block for each study and the weighted mean prevalence by age group and overall. Note within age-group heterogeneity could not be tested for some groups due to the small number of studies and/or no events in some studies.

**eFigure 4:** Forest plot for the prevalence of second degree AV Block, type 1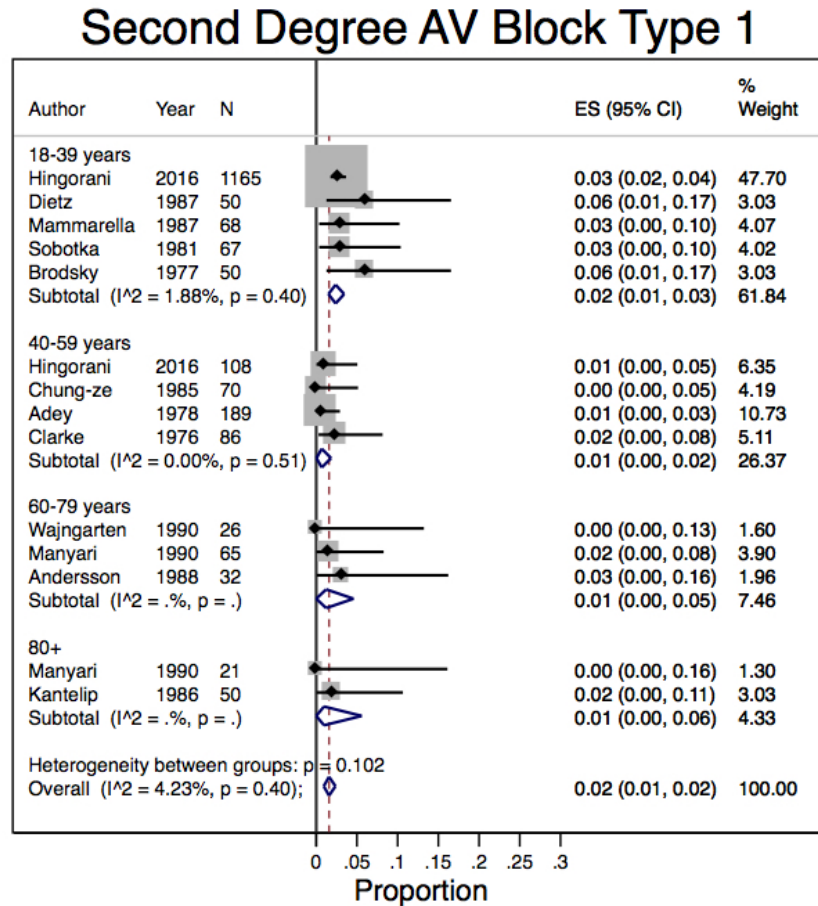

ES (effect size) denotes prevalence of second degree atrioventricular block, type 1, for each study and the weighted mean prevalence by age group and overall. Note within age-group heterogeneity could not be tested for some groups due to the small number of studies and/or no events in some studies.



**eFigure 5:** Funnel plots for meta-analyses of sinus pauses and conduction block

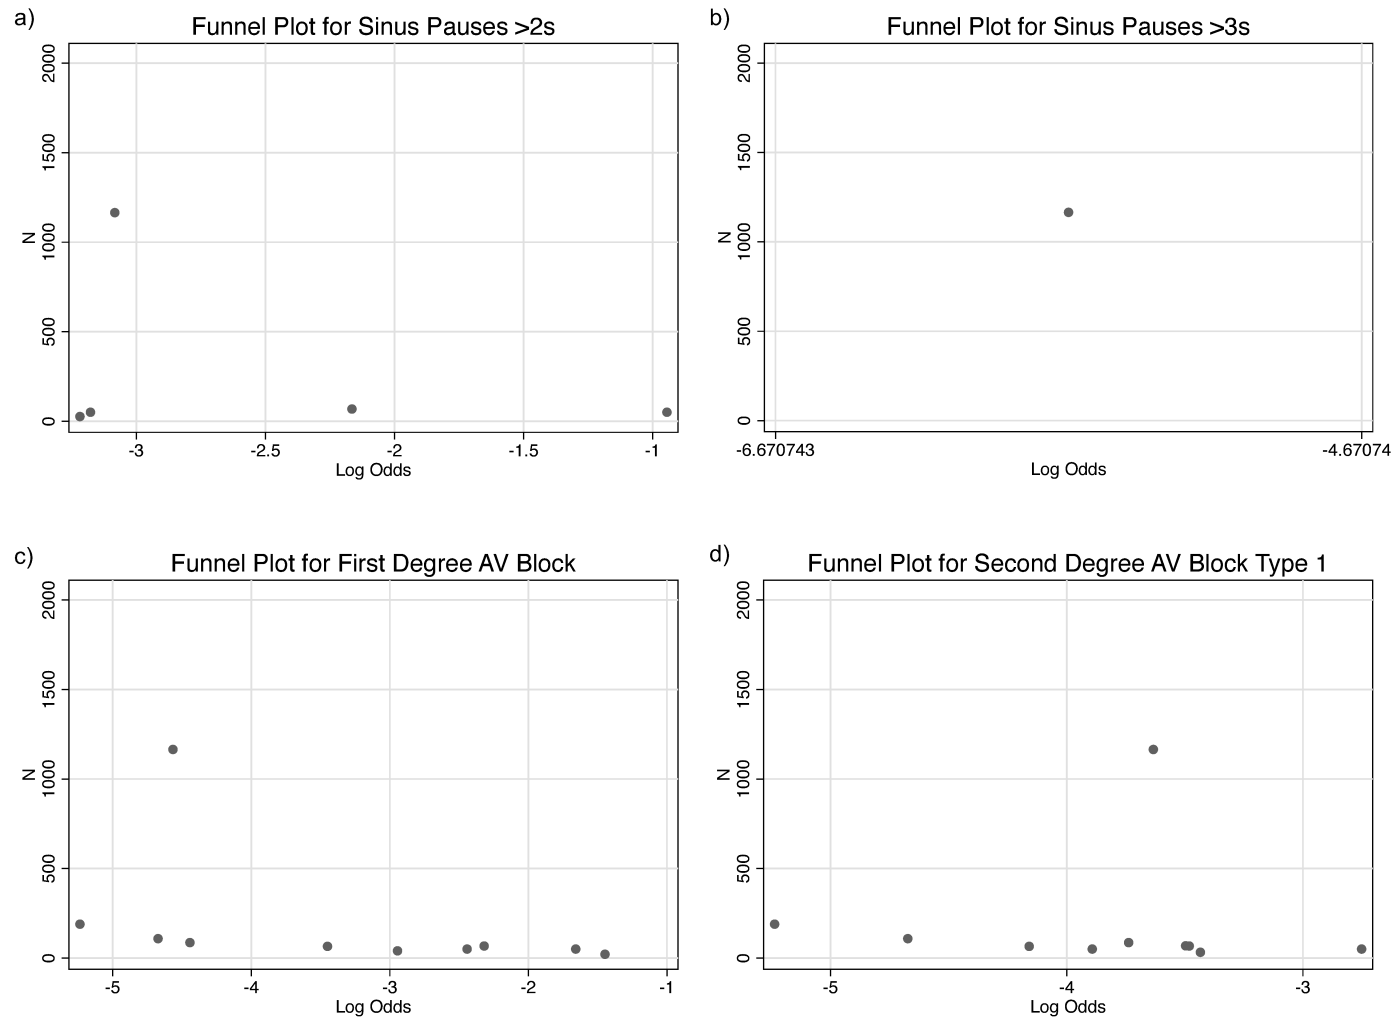

**eFigure 6:** Forest plot for the prevalence of any supraventricular ectopy

## Any Supraventricular Ectopy

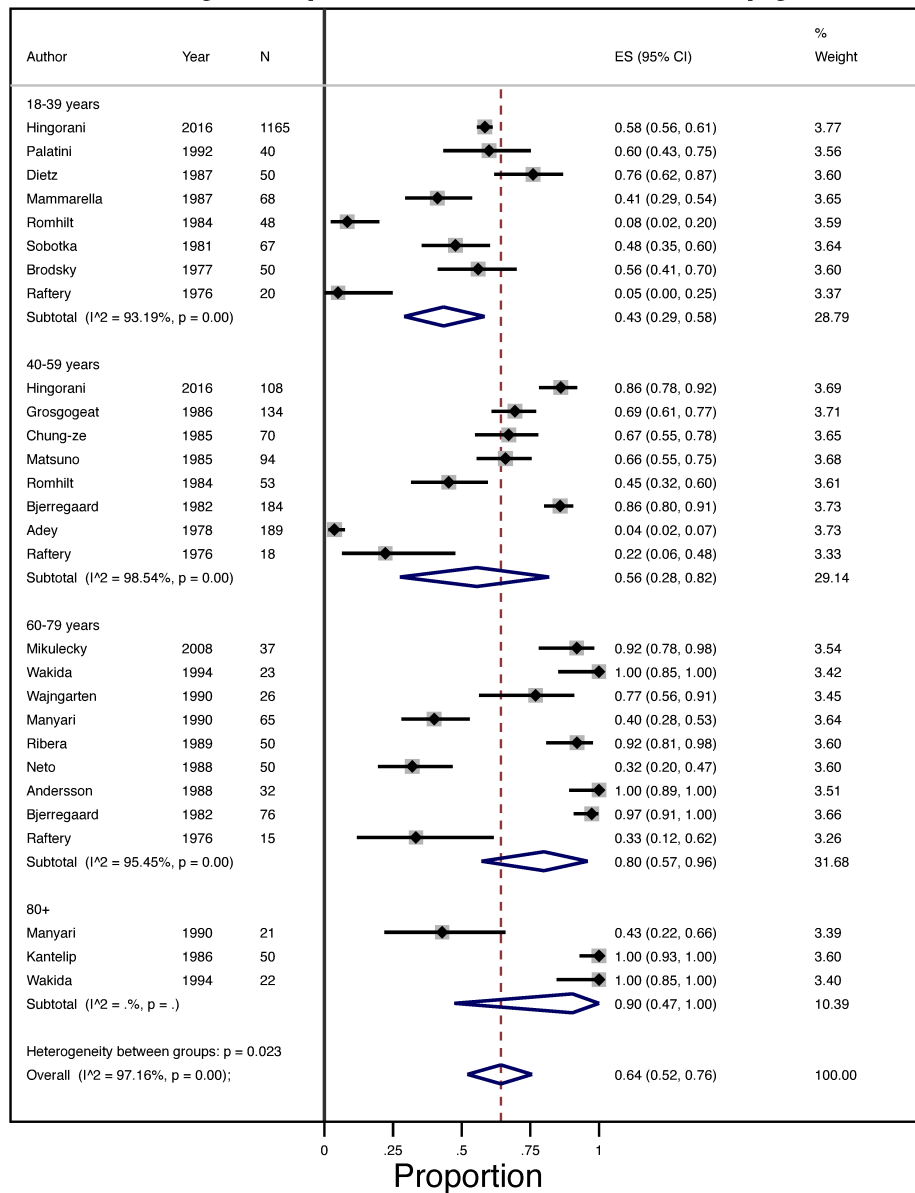

ES (effect size) denotes the weighted mean prevalence of any SVE, by age group and overall. Note within age-group heterogeneity could not be tested for some groups due to the small number of studies and/or no events in some studies.

**eFigure 7:** Funnel plots for meta-analyses of supraventricular ectopy and tachycardia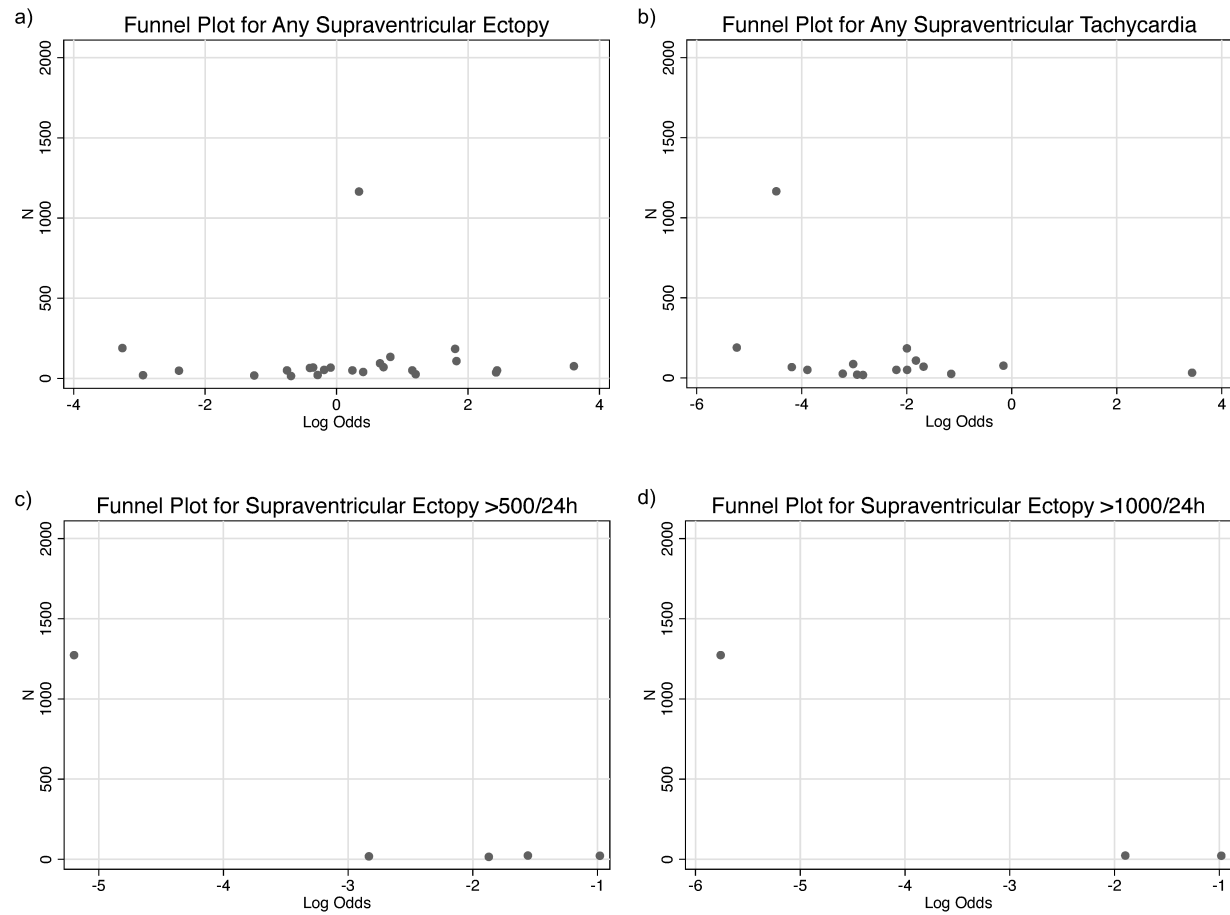

eFigure 8: Forest plot for the prevalence with any ventricular ectopy

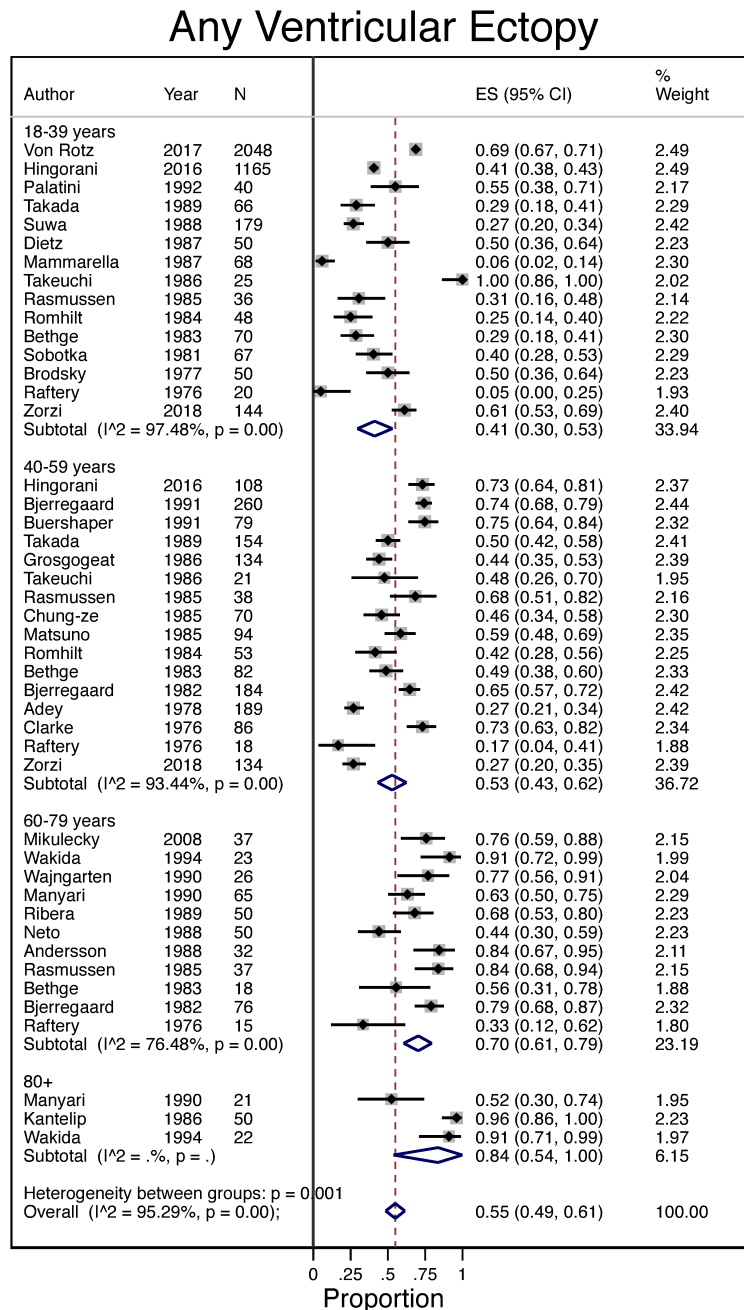

ES (effect size) denotes the weighted mean prevalence of any VE, by age group and overall. Note within age-group heterogeneity could not be tested for some groups due to the small number of studies and/or no events in some studies.

**eFigure 9:** Funnel plots for meta-analyses of ventricular ectopy and non-sustained ventricular tachycardia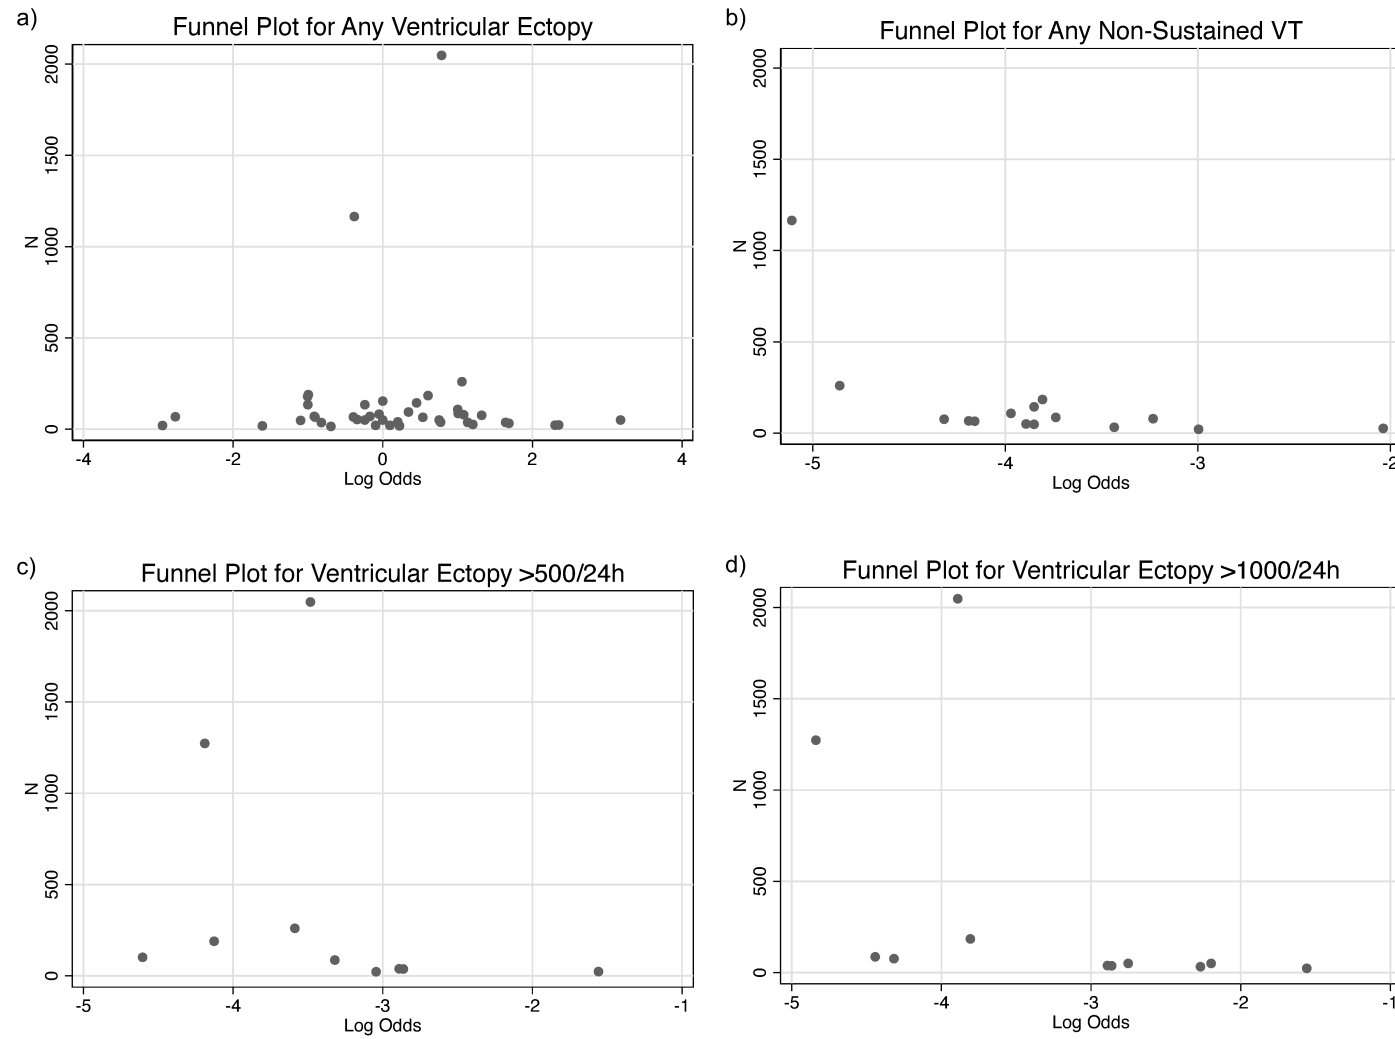

## Heart Rate Analysis

Nine studies reported mean heart rate (eFigure 10a). There was no data in those  $\geq 80$  years of age. The overall weighted mean heart rate was 78.1 beats per minute (bpm), with a central 95% range (2.5th to 97.5th percentile) from 61.2 to 95.0 bpm. The mean heart rate and 95% range was similar across all age groups. Similarly, the minimum heart rate (eFigure 10b) was similar across all age groups with overall weighted mean being 56.6 bpm (95% range from 41.2 to 72.0 bpm). However, lower 2.5th percentile for minimum heart rate varied with age and was 41.5 bpm in those 18-39, 43.4 bpm in those 40-59, and 37.4 with those 60-79 years. Maximum heart rate decreased with age (eFigure 10c), with a mean maximum heart rate of 123.5 bpm (95% range 93.2 to 153.8 bpm). One study in those 40-59 years, by Chung-Ze, was an outlier with a mean maximum heart rate of only 90.6 bpm. There was asymmetry in the funnel plots, particularly for minimum and maximum heart rate (eFigure 11) but the number of studies were small.

**eFigure 10: Forest plots of mean, minimum and maximum Heart Rates**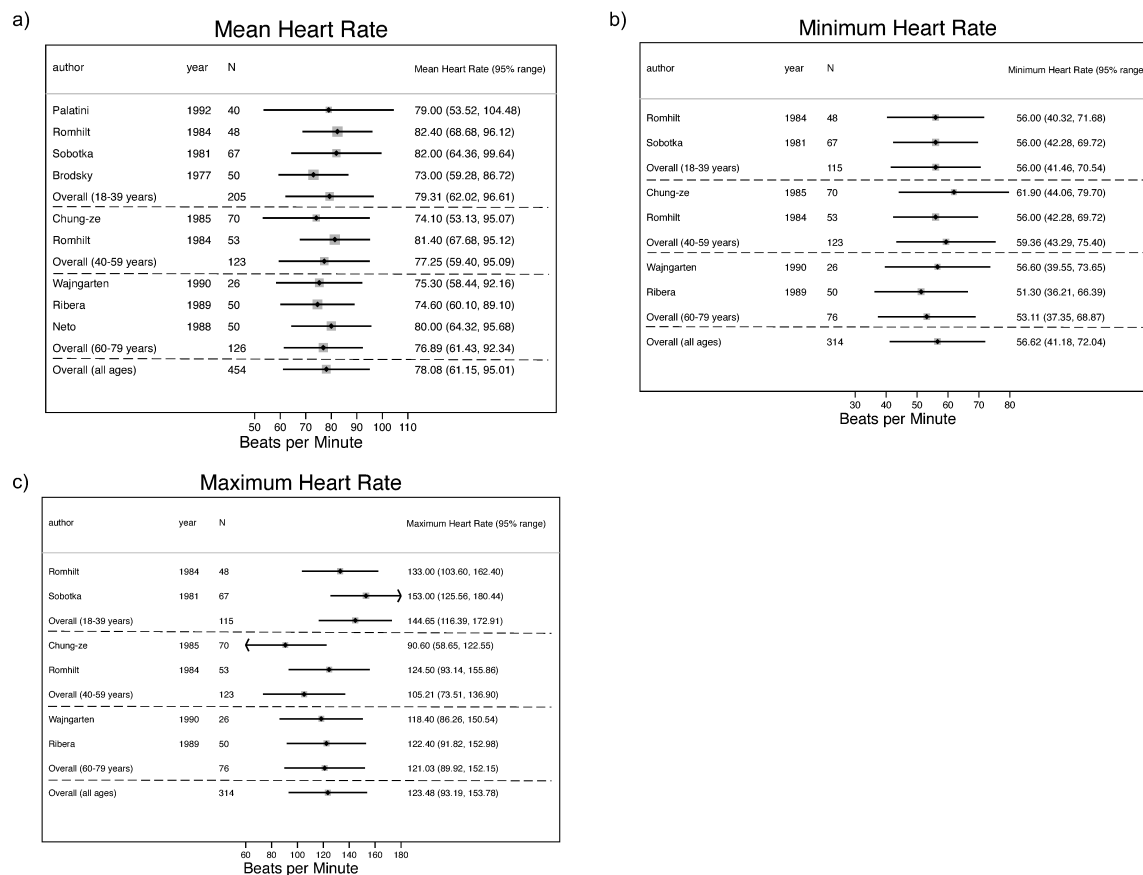

The weighted average mean (panel a), minimum (panel b) and maximum (panel c) heart rate for each study are presented, with central 95% ranges (2.5<sup>th</sup> to 97.5<sup>th</sup> percentile). The results are presented by age group and overall.

**eFigure 11:** Funnel plots for meta-analyses of mean, minimum and maximum heart rates

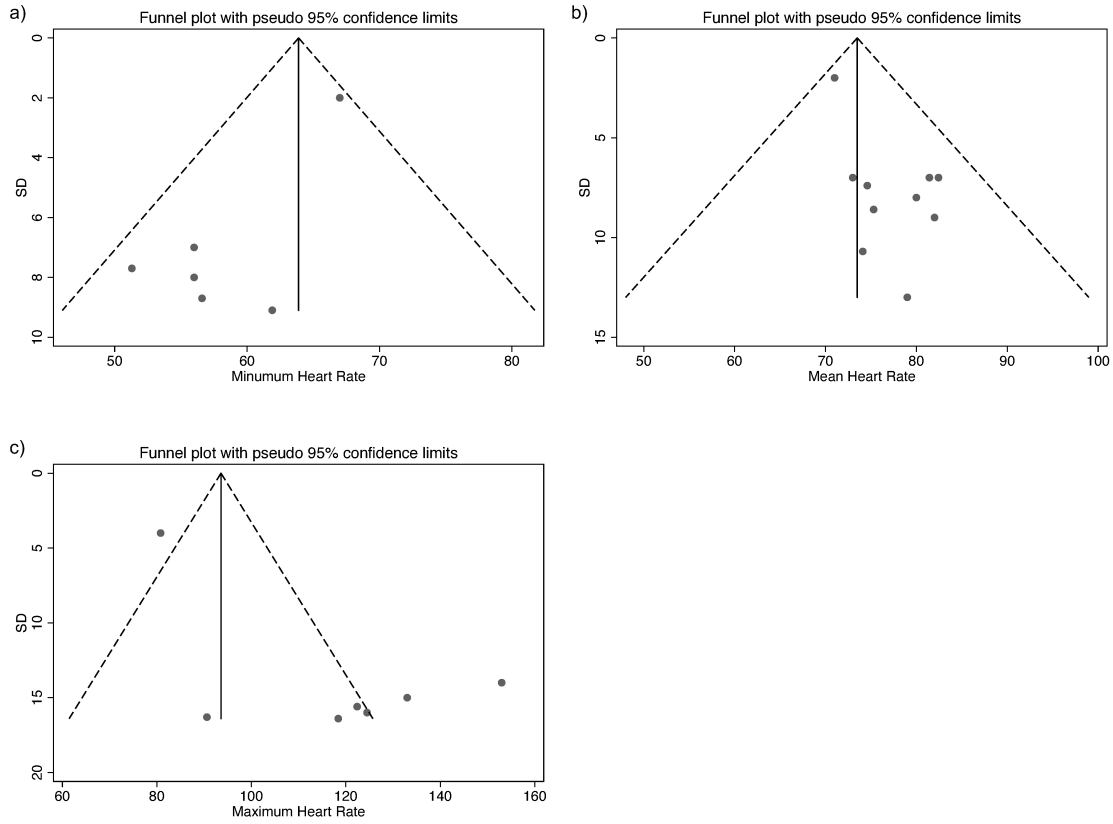



**Additional References: References 31-61**

- 31 Clarke JM, Hamer J, Shelton JR. The rhythm of the normal human heart. *Lancet* 1976;**2**:508-12.
- 32 Raftery EB, Cashman PMM. Long term recording of the electrocardiogram in a normal population. *Postgraduate Medical Journal* 1976;**52**:32-8.
- 33 Brodsky M, Wu D, Denes P, et al. Arrhythmias documented by 24 hour continuous electrocardiographic monitoring in 50 male medical students without apparent heart disease. *Am J Cardiol* 1977;**39**:390-5.
- 34 Adey H, Ballantyne DA, Bostock MI, et al. The prevalence of disturbance of cardiac rhythm in healthy New Zealand adults: A pilot study. *New Zealand Medical Journal* 1978;**88**:433-5.
- 35 Kostis JB, McCrone K, Moreyra AE, et al. Premature ventricular complexes in the absence of identifiable heart disease. *Circulation* 1981;**63**:1351-6.
- 36 Sobotka PA, Mayer JH, Bauernfeind RA, et al. Arrhythmias documented by 24-hour continuous ambulatory electrocardiographic monitoring in young women without apparent heart disease. *American Heart Journal* 1981;**101**:753-9.
- 37 Bjerregaard P. Premature beats in healthy subjects 40-79 years of age. *Eur Heart J* 1982;**3**:493-503.
- 38 Bethge KP, Bethge D, Meiners G, et al. Incidence and prognostic significance of ventricular arrhythmias in individuals without detectable heart disease. *Eur Heart J* 1983;**4**:338-46.
- 39 Romhilt DW, Chaffin C, Choi SC, et al. Arrhythmias on ambulatory electrocardiographic monitoring in women without apparent heart disease. *Am J Cardiol* 1984;**54**:582-6.
- 40 Liu CZ, Jan KM, Luo HS, et al. Ambulatory electrocardiographic findings in patients with essential hypertension vs. normal subjects without apparent heart diseases. *Taiwan yi xue hui za zhi* 1985;**Journal of the Formosan Medical Association**. **84**:571-8.

- 41 Matsuno Y, Nakazawa Y, Ishibashi Y, et al. Analysis of arrhythmias documented by Holter electrocardiographic monitoring in healthy subjects. [Japanese]. *Nihon Naika Gakkai zasshi* 1985;**The Journal of the Japanese Society of Internal Medicine**. **74**:890-7.
- 42 Rasmussen V, Jensen G, Schnohr P, et al. Premature ventricular beats in healthy adult subjects 20 to 79 years of age. *Eur Heart J* 1985;**6**:335-41.
- 43 Kantelip JP, Sage E, Duchene-Marullaz P. Findings on ambulatory electrocardiographic monitoring in subjects older than 80 years. *Am J Cardiol* 1986;**57**:398-401.
- 44 Grosogeat Y, Ducardonnet A, Valty J, et al. [Physiological limits of variations in heart rate measured by the Holter method in 134 normal subjects]. *Arch Mal Coeur Vaiss* 1986;**79**:324-31.
- 45 Takeuchi E, Nakayama R, Shimomura K. Analysis of arrhythmia in healthy subjects using 24-hour ambulatory ECGs. [Japanese]. *Rinsho byori* 1986;**The Japanese journal of clinical pathology**. **34**:861-4.
- 46 Dietz A, Walter J, Bracharz H, et al. [Cardiac arrhythmias in active elderly persons--age dependence of heart rate and arrhythmias]. *Z Kardiol* 1987;**76**:86-94.
- 47 Mammarella G, D'Urso A, Fraioli AM, et al. Diverse incidence of disorders of cardiac rhythm in athletes and untrained youngsters. [Italian]. *Minerva cardiologica* 1987;**35**:407-10.
- 48 Andersson S, Osterlind PO, Holmboe G, et al. Twenty-four-hour electrocardiography in a healthy elderly population. *Gerontology* 1988;**34**:139-44.
- 49 Savioli Neto F, Batlouni M, Guedes Mdo C, et al. [Cardiac arrhythmia in healthy elderly subjects: detection by dynamic electrocardiography]. *Arq Bras Cardiol* 1988;**51**:373-5.
- 50 Suwa M, Hirota Y, Kaku K, et al. Prevalence of the coexistence of left ventricular false tendons and premature ventricular complexes in apparently healthy subjects: A prospective study in the general population. *Journal of the American College of Cardiology* 1988;**12**:910-4.

- 51 Ribera JM, Cruz AJ, Zamorano JL, et al. Cardiac rate and hyperkinetic rhythm disorders in healthy elderly subjects: Evaluation by ambulatory electrocardiographic monitoring. *Gerontology* 1989;**35**:158-64.
- 52 Takada H, Mikawa T, Murayama M, et al. Range of ventricular ectopic complexes in healthy subjects studied with repeated ambulatory electrocardiographic recordings. *Am J Cardiol* 1989;**63**:184-6+A24.
- 53 Manyari DE, Patterson C, Johnson D, et al. Atrial and ventricular arrhythmias in asymptomatic active elderly subjects: Correlation with left atrial size and left ventricular mass. *American Heart Journal* 1990;**119**:1069-76.
- 54 Wajngarten M, Grupi C, Bellotti GM, et al. Frequency and significance of cardiac rhythm disturbances in healthy elderly individuals. *J Electrocardiol* 1990;**23**:171-6.
- 55 Bjerregaard P, Sorensen KE, Molgaard H. Predictive value of ventricular premature beats for subsequent ischaemic heart disease in apparently healthy subjects. *Eur Heart J* 1991;**12**:597-601.
- 56 Buerschaper M, Gonska BD, Bethge KP. [Prevalence of late potentials in high frequency signal-averaged electrocardiography and arrhythmias in long-term ECG in healthy probands]. *Z Kardiol* 1991;**80**:516-22.
- 57 Palatini P, Bongiovi S, Cordiano R, et al. Ventricular ectopic activity in physically trained hypertensive subjects. *Eur Heart J* 1992;**13**:316-20.
- 58 Wakida Y, Okamoto Y, Iwa T, et al. Arrhythmias in centenarians. *PACE - Pacing and Clinical Electrophysiology* 1994;**17**:2217-21.
- 59 Von Rotz M, Aeschbacher S, Bossard M, et al. Risk factors for premature ventricular contractions in young and healthy adults. *Heart* 2017;**103**:702-7.
- 60 Zorzi A, Lazzari MD, Mastella G, et al. Ventricular Arrhythmias in Young Competitive Athletes: Prevalence, Determinants, and Underlying Substrate. *Journal of the American Heart Association* 2018;**7**:e009171.

- 61 Zorzi A, Mastella G, Cipriani A, et al. Burden of ventricular arrhythmias at 12-lead 24-hour ambulatory ECG monitoring in middle-aged endurance athletes versus sedentary controls. *European Journal of Preventive Cardiology* 2018;**25**:2003-11.
